# Supplementary material for: Timing Is Everything: Impact of Naturally Occurring Staphylococcus aureus AgrC Cytoplasmic Domain Adaptive Mutations on Autoinduction
Source: PubMed Central journal article supplement (PMC6755735; doi:10.1128/jb.00409-19), 2019-09-20
Supplement: JB.00409-19-s0001.pdf [file JB.00409-19-s0001.pdf]

## Supplementary Information

**Table S1.** Bacterial strains and plasmids used in the study.

| Name                    | Description                                                                | Source                    |
|-------------------------|----------------------------------------------------------------------------|---------------------------|
| <b><i>S. aureus</i></b> |                                                                            |                           |
| RN4220                  | 8325-4 restriction negative derivative <i>rsbU</i> -                       | Kreiswerth et al 1983 (1) |
| ROJ48                   | RN4220 $\Delta$ <i>agr::ErmB agrP3-lux Tet<sup>R</sup> Erm<sup>R</sup></i> | Jensen et al 2008 (2)     |
| ROJ143                  | ROJ48 pAgrP2C1A                                                            | Jensen et al 2008 (2)     |
| TS112                   | ROJ48 pAgrP2C1A <i>agrC N267I</i>                                          | This laboratory           |
| TS113                   | ROJ48 pAgrP2C1A <i>agrC I311T</i>                                          | Jensen et al 2008 (2)     |
| TS114                   | ROJ48 pAgrP2C1A <i>agrC Y251F</i>                                          | This laboratory           |
| TS115                   | ROJ48 pAgrP2C1A <i>agrC A343T</i>                                          | This laboratory           |
| TS119                   | ROJ48 pAgrP2C1A <i>agrC N267I Y251F</i>                                    | This laboratory           |
| TS120                   | ROJ48 pAgrP2C1A <i>agrC I311T A343T</i>                                    | This laboratory           |
| TS143                   | ROJ48 pAgrP2C1A <i>agrC L245A</i>                                          | This laboratory           |
| TS144                   | ROJ48 pAgrP2C1A <i>agrC F264A</i>                                          | This laboratory           |
| TS145                   | ROJ48 pAgrP2C1A <i>agrC N308A</i>                                          | This laboratory           |
| TS152                   | ROJ48 pAgrP2C1A <i>agrC T247I</i>                                          | This laboratory           |
| CYL12349                | RN4220 <i>attB2</i> pYL112 $\Delta$ 19                                     | Lei et al 2012 (3)        |
| MY15                    | ROJ48 <i>attB2::P2agrC1agrA</i>                                            | This laboratory           |
| MY20                    | ROJ48 <i>attB2::P2agrC1agrA AgrC-N267I</i>                                 | This laboratory           |
| TS12                    | ST30 MSSA spa t021 PVL+, wound infection                                   | Okokunefor et al 2012 (4) |
| TS13                    | ST22 MSSA spa t005 PVL+, leg abscess                                       | Okokunefor et al 2012 (4) |
| TS14                    | ST22 MSSA spa t005 PVL+, leg ulcer                                         | Okokunefor et al 2012 (4) |
| IU12                    | ST239 <i>agrC I311T</i>                                                    | Laabei et al 2014 (5)     |
| HU24                    | ST239 <i>agrC I311T A343T</i>                                              | Laabei et al 2014 (5)     |
| ICP5014                 | ST239                                                                      | Laabei et al 2014 (5)     |
| ICP5062                 | ST239 <i>agrC T247I</i>                                                    | Laabei et al 2014 (5)     |
| <b>Plasmids</b>         |                                                                            |                           |
| pAgrP2C1A               | pSKerm <i>agrP2 agrC1 agrA Cm<sup>R</sup></i>                              | Jensen et al 2008 (2)     |
| pLL102                  | Derivative of pCL25 carrying <i>attP2 Tet<sup>R</sup></i>                  | Lei et al 2012 (6)        |
| pEJM6                   | pLL02 <i>P2agrC1agrA Tet<sup>R</sup>, Kan<sup>R</sup></i>                  | This laboratory           |
| pMYP3                   | pLL102 <i>P2agrC1agrA AgrC-N267I Tet<sup>R</sup>, Kan<sup>R</sup></i>      | This laboratory           |

MSSA = Methicillin sensitive *S. aureus*. MRSA = Methicillin resistant *S. aureus*. NUH = Nottingham University Hospitals. CC = Clonal complex. ST = Sequence type. PVL = Pantone-Valentine Leukocidin. Tet<sup>R</sup> = Tetracycline resistance. Erm<sup>R</sup> = Erythromycin resistance. Cm<sup>R</sup> = Chloramphenicol resistance. Kan<sup>R</sup> = Kanamycin resistance.

**Table S2.** Oligonucleotides used in the study

| Name           | Sequence (5' to 3')                    | Application              |
|----------------|----------------------------------------|--------------------------|
| AgrBDCAF       | ACAACACTCATCAACTATTTTCC                | <i>agr</i> amplification |
| AgrBDCAR       | GATTTACAATTGAATACGCCG                  | <i>agr</i> amplification |
| Agrfull F      | GCAACGCGAAAATATACCTG                   | <i>agr</i> sequencing    |
| Agrfull R      | GCGTTGCTGCAATAGTGACA                   | <i>agr</i> sequencing    |
| AgrC 5' B      | AAAGAGATGAAATACAAACG                   | <i>agr</i> sequencing    |
| AgrA 5' A      | ATTAACAACACTAGCCATAAGG                 | <i>agr</i> sequencing    |
| AgrB F         | AATAAAAATTGACCAGTTTGC                  | <i>agr</i> sequencing    |
| agrC R         | GAATAATACCAATACTGCGAC                  | <i>agr</i> sequencing    |
| AgrC-N267I-F   | (P)AGACAATTTACAAATGAATGCTATAAAAATTA    | SDM                      |
| AgrC-N267I-R   | (P)TTCATAGGTACAATAATTTTATTGAAATAAT     | SDM                      |
| AgrC-Y251F-F   | (P)CACTTTTCAGAATTCATTGAGAAAGATGA       | SDM                      |
| AgrC-Y251F-R   | (P)TCGTTAAGATATTGACATAATCATGACG        | SDM                      |
| AgrC-A343T-F   | (P)GATAATGCAATTGAGACATCAACTGAAA        | SDM                      |
| AgrC-A343T-R   | (P)AAGAATAATACCAATACTGCGACTTAAATC      | SDM                      |
| AgrC-I311T-F   | (P)AAATGAATATCCGACTAGTATCGAAATACC      | SDM                      |
| AgrC-I311T-R   | (P)CTTGTGCACGTAATAATTTTCGCAGTAAT       | SDM                      |
| AgrC-L245A-F   | (P)ATTATGTCAATATCGCAACGACACTTTCAG      | SDM                      |
| AgrC- L245A-R  | (P)CATGACGGAACCTTGCGCA                 | SDM                      |
| AgrC-F264A-F   | (P)GGCCTACGTGATTATGCTAATAAAAATATTGTACC | SDM                      |
| AgrC- F264A-R  | (P)AGGCATGTCATCTTCTCGAATGTA            | SDM                      |
| AgrC-N308A-F   | (P)GCACAAGAAATGGCTATTCCGATTAGTATC      | SDM                      |
| AgrC- N308A-R  | (P)ACGTAAAATTTTCGCAGTAATTAAGCCTT       | SDM                      |
| AgrC- T247I-F4 | (P)TACTTTTCAGAATACATTTCGAGAA           | SDM                      |
| AgrC- T247I-R4 | (P)TCGTTAAGATATTGACATAATCAT            | SDM                      |
| GyrB F         | GGTGGCGACTTTGATCTAGC                   | qRT-PCR                  |
| GyrB R         | TTATACAACGGTGGCTGTGC                   | qRT-PCR                  |
| LukS-PV F      | AATAACGTATGGCAGAAATATGGATGT            | qRT-PCR                  |
| LukS-PV R      | CAAATGCGTTGTGTATTCTAGATCCT             | qRT-PCR                  |
| RNAIII F       | GGGATGGCTTAATAACTCATAC                 | qRT-PCR                  |
| RNAIII R       | GGAAGGAGTGATTTCAATGG                   | qRT-PCR                  |
| EJM63          | ATACGAATTCCCATGGCAACTATTTCCATCACA      | <i>agr</i> cloning       |
| EJM65          | ATCGGATCCGTTAACTGACTTTATTATC           | <i>agr</i> cloning       |

(P) = 5' phosphorylation. (B) = 5' biotinylation. SDM = site directed mutagenesis. qRT-PCR = quantitative real time PCR.

**Table S3.** Non-synonymous SNPs found in TS13 only

A complete list of SNPs unique to TS13 that resulted in coding sequence changes. The location numbers indicate the base position on the reference strain HO 5096 0412 (GenBank accession no. **NC 017763.1**) with both the reference base and TS13 variant shown. The coding sequence ID from the reference annotation is in column 4 with the annotated gene name (if known) in column 5 and description in column 6. The SNPs in *agrC* (N267I) and *sarU* (D134Y) are shown in bold.

| Location | Reference | TS13 | Coding Sequence ID | Gene product | Description                                                          |
|----------|-----------|------|--------------------|--------------|----------------------------------------------------------------------|
| 116754   | G         | A    | 920                | -            | putative_membrane_protein                                            |
| 116755   | G         | A    | 920                | -            | putative_membrane_protein                                            |
| 182155   | G         | A    | 1480               | argJ         | putative_arginine_biosynthesis_bifunctional_protein                  |
| 296240   | G         | A    | 2370               | -            | putative_membrane_protein                                            |
| 303593   | G         | A    | 2420               | -            | putative_membrane_protein                                            |
| 352330   | C         | G    | 2880               | -            | putative_PTS_multidomain_regulator                                   |
| 413095   | G         | A    | 3490               | -            | hypothetical_protein                                                 |
| 440311   | G         | T    | 3770               | -            | putative_NADH-Ubiquinone/plastoquinone_(complex_I)_protein           |
| 458517   | C         | T    | 3960               | -            | LysR-family_regulatory_protein                                       |
| 499087   | G         | A    | 4280               | -            | putative_peptidyl-tRNA_hydrolase                                     |
| 546662   | G         | A    | 4570               | -            | conserved_hypothetical_protein                                       |
| 594078   | T         | C    | 4930               | -            | conserved_hypothetical_protein                                       |
| 637356   | G         | A    | 5400               | -            | putative_hydrolase                                                   |
| 676430   | C         | G    | 5800               | -            | putative_membrane_protein                                            |
| 714778   | C         | T    | 6180               | -            | putative_membrane_protein                                            |
| 736167   | T         | C    | 6410               | -            | putative_para-aminobenzoate_synthetase_component                     |
| 933720   | A         | G    | 8230               | -            | putative_oligopeptide_transport_system_permease_protein_(pseudogene) |
| 1044535  | C         | T    | 9260               | pdhD         | dihydroliipoamide_dehydrogenase                                      |
| 1074548  | G         | A    | 9580               | isdB         | iron-regulated_heme-iron_binding_protein_(pseudogene)                |
| 1243331  | T         | C    | 11110              | -            | conserved_hypothetical_protein                                       |
| 1253375  | A         | G    | 11200              | -            | transposase_(fragment)                                               |

|                |          |          |              |             |                                                        |
|----------------|----------|----------|--------------|-------------|--------------------------------------------------------|
| 1256697        | A        | G        | 11240        | -           | putative_pyruvate_flavodoxin/ferredoxin_oxidoreductase |
| 1314907        | A        | G        | 11870        | -           | putative_membrane_protein                              |
| 1322367        | T        | A        | 11930        | -           | putative_exonuclease                                   |
| 1384978        | G        | C        | 12500        | -           | ABC_transporter_ATP-binding_protein                    |
| 1449776        | C        | T        | 12970        | ebh         | very_large_surface_anchored_protein_(pseudogene)       |
| 1481909        | C        | A        | 13120        | -           | putative_exported_protein                              |
| 1605227        | T        | A        | 14460        | -           | conserved_hypothetical_protein                         |
| 1606147        | G        | A        | 14470        | accC        | biotin_carboxylase_subunit_of_acetyl-CoA_carboxylase   |
| 1638949        | A        | G        | 14840        | -           | conserved_hypothetical_protein,_pseudogene             |
| 1663284        | A        | T        | 15070        | -           | putative_membrane_protein                              |
| 1713713        | T        | A        | 15560        | tgt         | queuine_tRNA-ribosyltransferase                        |
| 1827886        | T        | C        | 16530        | -           | putative_aminopeptidase                                |
| 1853199        | C        | T        | 16710        | -           | transposase                                            |
| 1881489        | T        | G        | 16990        | pckA        | phosphoenolpyruvate_carboxykinase                      |
| 1883817        | C        | A        | 17020        | -           | conserved_hypothetical_protein                         |
| 1924033        | G        | A        | 17480        | -           | putative_membrane_protein                              |
| 1995463        | C        | A        | 18090        | putP        | high_affinity_proline_permease                         |
| 2007441        | A        | G        | 18180        | -           | transposase_(fragment)                                 |
| 2007881        | C        | A        | 18190        | -           | transposase_(fragment)                                 |
| 2007902        | T        | C        | 18190        | -           | transposase_(fragment)                                 |
| 2017193        | C        | T        | 18280        | -           | isochorismatase_family_protein                         |
| 2027595        | T        | A        | 18370        | -           | Tn554-related,_transposase_B                           |
| 2035006        | C        | T        | 18470        | -           | putative_ABC_transporter_ATP-binding_protein           |
| 2038477        | T        | C        | 18510        | -           | hypothetical_protein                                   |
| <b>2108636</b> | <b>A</b> | <b>T</b> | <b>19460</b> | <b>agrC</b> | <b>autoinducer_sensor_protein</b>                      |
| 2160133        | G        | A        | 19870        | kdpA        | putative_potassium-transporting_ATPase_a_chain         |
| 2293253        | G        | A        | 21030        | -           | hypothetical_protein                                   |
| 2405583        | G        | A        | 22290        | hutU        | urocanate_hydratase                                    |
| 2424120        | G        | A        | 22480        | -           | hypothetical_protein                                   |
| 2492551        | A        | T        | 23120        | -           | transport_system_membrane_protein                      |

|                |          |          |              |             |                                                             |
|----------------|----------|----------|--------------|-------------|-------------------------------------------------------------|
| 2509829        | G        | A        | 23280        | -           | transposase_(fragment)                                      |
| 2509877        | G        | A        | 23280        | -           | transposase_(fragment)                                      |
| 2510039        | A        | G        | 23280        | -           | transposase_(fragment)                                      |
| 2540395        | T        | G        | 23510        | -           | putative_carboxylesterase                                   |
| 2584539        | G        | T        | 23940        | -           | putative_membrane_protein                                   |
| 2586266        | C        | T        | 23950        | sasG        | LPXTG_surface_protein_(pseudogene)                          |
| 2586704        | A        | G        | 23950        | sasG        | LPXTG_surface_protein_(pseudogene)                          |
| <b>2589488</b> | <b>G</b> | <b>T</b> | <b>23970</b> | <b>sarU</b> | <b>staphylococcal_accessory_regulator</b>                   |
| 2595084        | G        | A        | 24010        | gntP        | putative_gluconate_permease                                 |
| 2597763        | T        | C        | 24030        | gntR        | gluconate_operon_transcriptional_repressor                  |
| 2608565        | G        | T        | 24120        | -           | ABC_transporter_ATP-binding_protein                         |
| 2614629        | G        | T        | 24170        | -           | putative_dioxygenase                                        |
| 2639555        | G        | A        | 24450        | -           | LysR-family_regulatory_protein                              |
| 2645865        | A        | G        | 24510        | clpL        | putative_ATP-dependent_protease_ATP-binding_subunit_ClpL    |
| 2664626        | G        | T        | 24660        | -           | putative_glycosyltransferase                                |
| 2666092        | C        | T        | 24670        | -           | putative_phytoene_dehydrogenase_related_protein             |
| 2737433        | G        | A        | 25350        | clfB        | fibrinogen_and_keratin-10_binding_surfaced_anchored_protein |
| 2737646        | T        | C        | 25350        | clfB        | fibrinogen_and_keratin-10_binding_surfaced_anchored_protein |
| 2737658        | A        | G        | 25350        | clfB        | fibrinogen_and_keratin-10_binding_surfaced_anchored_protein |
| 2737661        | A        | G        | 25350        | clfB        | fibrinogen_and_keratin-10_binding_surfaced_anchored_protein |
| 2737673        | G        | A        | 25350        | clfB        | fibrinogen_and_keratin-10_binding_surfaced_anchored_protein |
| 2737685        | A        | G        | 25350        | clfB        | fibrinogen_and_keratin-10_binding_surfaced_anchored_protein |
| 2791513        | A        | G        | 25750        | icaB        | intercellular_adhesion_protein_B                            |
| 2810175        | T        | C        | 25930        | cna         | collagen_adhesin_precursor                                  |
| 2810187        | A        | G        | 25930        | cna         | collagen_adhesin_precursor                                  |
| 2810190        | T        | C        | 25930        | cna         | collagen_adhesin_precursor                                  |
| 2810331        | C        | T        | 25930        | cna         | collagen_adhesin_precursor                                  |

**Table S4.** Non-synonymous SNPs found in TS14 only

A complete list of SNPs which were unique to TS14 and resulted in coding sequence changes. The location numbers indicate the base position on the reference strain HO 5096 0412 (GenBank accession no. [NC\\_017763.1](#)) with both the reference base and TS14 variant shown. The coding sequence ID from the reference annotation is in column 4 with the annotated gene name (if known) in column 5 and description in column 6.

| Location | Reference | TS14 | Coding Sequence ID | Gene product | Description                                                   |
|----------|-----------|------|--------------------|--------------|---------------------------------------------------------------|
| 36913    | G         | T    | 270                | -            | putative_transposase                                          |
| 68139    | A         | T    | 520                | -            | TetR_family_regulatory_protein                                |
| 68141    | A         | C    | 520                | -            | TetR_family_regulatory_protein                                |
| 131435   | T         | C    | 1070               | -            | binding-protein-dependent_transport_system_membrane_component |
| 166233   | G         | A    | 1380               | -            | putative_lipoprotein                                          |
| 168047   | T         | G    | 1400               | -            | conserved_hypothetical_protein,_pseudogene                    |
| 271844   | C         | T    | 2160               | -            | hypothetical_protein                                          |
| 284663   | G         | A    | 2260               | bglA         | 6-phospho-beta-glucosidase                                    |
| 361479   | C         | A    | 2960               | -            | putative_membrane_protein                                     |
| 382759   | A         | G    | 3160               | -            | putative_membrane_protein                                     |
| 540747   | C         | T    | 4520               | radA         | putative_DNA_repair_protein                                   |
| 561505   | A         | G    | 4720               | rpsL         | 30S_ribosomal_protein_S12                                     |
| 688820   | G         | A    | 5910               | -            | putative_exported_protein                                     |
| 691792   | C         | T    | 5930               | -            | AraC_family_regulatory_protein                                |
| 704056   | A         | C    | 6090               | bacA         | putative_undecaprenol_kinase                                  |
| 720120   | C         | T    | 6250               | -            | putative_phosphofructokinase                                  |
| 742346   | G         | A    | 6460               | -            | ABC_transporter_ATP-binding_protein                           |
| 787395   | C         | T    | 6850               | uvrA         | excinuclease_ABC_subunit_A                                    |
| 878668   | A         | G    | 7770               | mnhF         | Na <sup>+</sup> /H <sup>+</sup> _antiporter_subunit           |
| 886859   | G         | A    | 7860               | -            | NADH:flavin_oxidoreductase/_NADH_oxidase_family_protein       |
| 963079   | G         | A    | 8500               | prfC         | peptide_chain_release_factor_3                                |
| 1015251  | C         | T    | 9000               | purL         | putative_phosphoribosylformylglycinamide_synthase_II          |

|         |   |   |       |      |                                                                         |
|---------|---|---|-------|------|-------------------------------------------------------------------------|
| 1125117 | C | T | 10100 | -    | conserved_hypothetical_protein                                          |
| 1143560 | A | G | 10270 | -    | glyoxalase/bleomycin_resistance_protein/dioxygenase_superfamily_protein |
| 1158601 | G | A | 10410 | -    | conserved_hypothetical_protein                                          |
| 1224943 | G | T | 10970 | polC | DNA_polymerase_III_PolC-type                                            |
| 1228731 | C | T | 10990 | nusA | putative_N_utilization_substance_protein_A                              |
| 1253708 | C | A | 11200 | -    | transposase_(fragment)                                                  |
| 1271854 | G | A | 11360 | -    | putative_hydrolase                                                      |
| 1351231 | A | T | 12150 | trpE | anthranilate_synthase_component_I                                       |
| 1432637 | C | T | 12970 | ebh  | very_large_surface_anchored_protein_(pseudogene)                        |
| 1567552 | G | A | 13480 | -    | hypothetical_protein,_pseudogene                                        |
| 1589216 | C | G | 14310 | -    | glyoxalase/bleomycin_resistance_protein/dioxygenase_superfamily_protein |
| 1652227 | A | G | 14990 | dnaJ | chaperone_protein                                                       |
| 1673889 | T | C | 15210 | -    | hypothetical_phage_protein                                              |
| 1686714 | G | C | 15360 | alaS | putative_alanyl-tRNA_synthetase                                         |
| 1705223 | C | T | 15510 | relA | GTP_pyrophosphokinase                                                   |
| 1851017 | C | A | 16680 | -    | conserved_hypothetical_protein                                          |
| 1883618 | C | T | 17020 | -    | conserved_hypothetical_protein                                          |
| 1916224 | G | A | 17390 | trap | signal_transduction_protein                                             |
| 2162741 | G | T | 19880 | kdpD | sensor_kinase_protein                                                   |
| 2177589 | T | C | 20030 | tenA | transcriptional_activator                                               |
| 2178861 | C | T | 20040 | -    | putative_exported_protein                                               |
| 2235170 | A | G | 20620 | mtIA | PTS_system,_mannitol-specific_IIBC_component                            |
| 2240552 | C | G | 20660 | fmtB | putative_surface_anchored_protein                                       |
| 2249903 | T | C | 20690 | -    | putative_membrane_protein                                               |
| 2477430 | G | A | 22960 | narG | nitrate_reductase_alpha_chain                                           |
| 2529128 | T | C | 23420 | -    | hypothetical_protein                                                    |
| 2586650 | C | T | 23950 | sasG | LPXTG_surface_protein_(pseudogene)                                      |
| 2592008 | C | A | 23990 | fnbA | fibronectin-binding_protein_FnbA                                        |
| 2632747 | A | G | 24370 | -    | transposase_(pseudogene)                                                |
| 2634271 | A | G | 24410 | glcB | PTS_system,_glucose-specific_IIABC_component                            |

|         |   |   |       |      |                                                             |
|---------|---|---|-------|------|-------------------------------------------------------------|
| 2650324 | T | C | 24550 | -    | putative_transport_protein                                  |
| 2657496 | G | A | 24600 | copA | putative_copper_importing_ATPase_A                          |
| 2673509 | T | C | 24730 | -    | putative_membrane_protein                                   |
| 2682118 | G | A | 24840 | -    | alcohol_dehydrogenase                                       |
| 2702279 | T | G | 25060 | ldh2 | L-lactate_dehydrogenase_2                                   |
| 2737436 | T | G | 25350 | clfB | fibrinogen_and_keratin-10_binding_surfaced_anchored_protein |
| 2810244 | G | A | 25930 | cna  | collagen_adhesin_precursor                                  |
| 2810302 | G | C | 25930 | cna  | collagen_adhesin_precursor                                  |
| 2810622 | G | A | 25930 | cna  | collagen_adhesin_precursor                                  |
| 2810673 | A | G | 25930 | cna  | collagen_adhesin_precursor                                  |
| 2810748 | G | A | 25930 | cna  | collagen_adhesin_precursor                                  |
| 2810781 | A | G | 25930 | cna  | collagen_adhesin_precursor                                  |



**Table S5.** Summary of AIP production and AgrC activation by clinical *S. aureus* strains

Summary of AIP production profiles of paired clinical strains analysed throughout growth. Strains are shown with corresponding AgrC substitutions in brackets. The time when AIP was first detected is indicated with the mean final AIP concentrations shown in nM (SD). EC<sub>50</sub> values for the corresponding *agrC* mutations when introduced into an *agrC1A-agrP3::lux* bioreporter strain are also shown in nM (SD). Growth rate ( $\mu$ ) was calculated as  $\ln 2$ /doubling time (h) during exponential phase.

| Strain<br>(AgrC substitution) | Timing of AIP<br>induction (h) | Stationary AIP<br>concentration<br>(nM +/- SD) | Bioreporter EC <sub>50</sub><br>(nM +/- SD) |
|-------------------------------|--------------------------------|------------------------------------------------|---------------------------------------------|
| TS14 (Y251F)                  | 3.5                            | 1052.5 (40.2)                                  | 2.8 (1.2)                                   |
| TS13<br>(Y251F/N267I)         | 4.5                            | 546.4 (32.3)                                   | 9.3 (1.8)                                   |
| IU12 (I311T)                  | 6.0                            | 278.8 (92.3)                                   | 17.4 (3.5)                                  |
| HU24<br>(I311T/A343T)         | 7.0                            | 55.1 (7.8)                                     | 29.5 (3.1)                                  |
| ICP5014 (WT)                  | 4.0                            | 606.6 (115.1)                                  | 3.4 (0.6)                                   |
| ICP5062 (T247I)               | 7.0                            | 53.4 (9.7)                                     | 22.9 (2.6)                                  |

**Table S6.** RMSD values comparing the WT to AgrC mutants

|             | RMSD Å (SD) |
|-------------|-------------|
| WT          | 3.0 (0.5)   |
| A343T       | 2.6 (0.8)   |
| I311T       | 4.8 (1.2)   |
| I311T-A343T | 3.5 (0.6)   |
| N267I       | 3.2 (0.9)   |
| T247I       | 2.6 (0.7)   |
| T247I-I311T | 8.3 (1.5)   |
| F251Y       | 2.6 (0.8)   |
| F251Y-N267I | 3.3 (1.0)   |

**Figure S1.** Heatmap plots of AgrC mutant and wild type proteins showing the root mean square deviation (RMSD) variation for each residue along the chain (ordinate) over an 80 ns trajectory (abscissa blocks). RMSD values are colour-encoded according to the colour chart on the right up to 25Å. In mutants T247I-I311T and F251Y-N267I maximum variation is 41.1 and 26.5Å, respectively, and extremes are colour saturated. All mutants are plotted on the same colour scale. RMSD analysis was done using VMD (7).

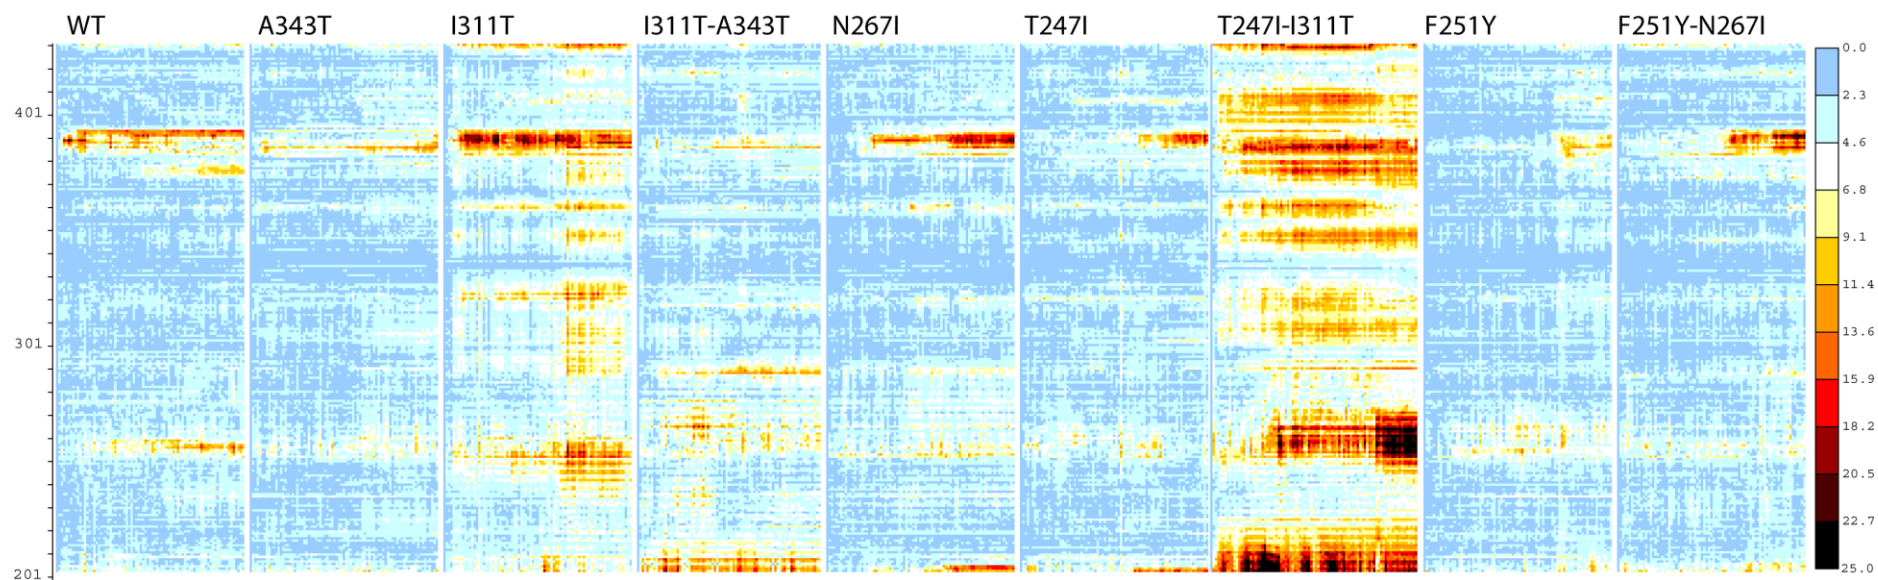

**Figure S2.** Docked conformation of ATP in the cytoplasmic domain of AgrC. The backbone structure of the WT domain is shown in orange and the ATP molecule is shown in all-atom space-filling representation. Standard colour coding was used for all atoms (C-grey; N-blue; P-orange; O-red; H-white) and hydrogens are not shown; T343 (red arrow) is shown in all-atom representation. Semi-rigid docking assessment was performed using Swiss-Dock (8) and the top ranking binding site was found in agreement with flexible docking using Autodock Vina (9). Molecular visualisation was done in UCSF Chimera (10).

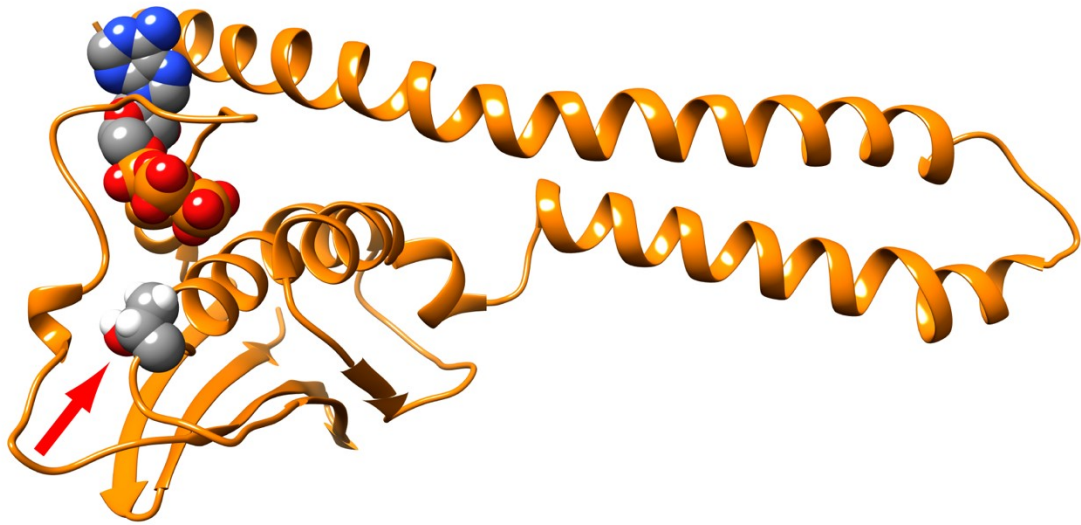

## Supplementary references

1. Kreiswirth BN, Lofdahl S, Betley MJ, O'Reilly M, Schlievert PM, Bergdoll MS, Novick RP. 1983. The toxic shock syndrome exotoxin structural gene is not detectably transmitted by a prophage. *Nature* 305:709-12.
2. Jensen RO, Winzer K, Clarke SR, Chan WC, Williams P. 2008. Differential recognition of *Staphylococcus aureus* quorum-sensing signals depends on both extracellular loops 1 and 2 of the transmembrane sensor AgrC. *J Mol Biol* 381:300-9.
3. Lei MG, Cue D, Alba J, Junecko J, Graham JW, Lee CY. 2012. A single copy integration vector that integrates at an engineered site on the *Staphylococcus aureus* chromosome. *BMC research notes* 5:5.
4. Otokunefor K, Sloan T, Kearns AM, James R. 2012. Molecular characterization and panton-valentine leucocidin typing of community-acquired methicillin-sensitive *Staphylococcus aureus* clinical isolates. *J Clin Microbiol* 50:3069-72.
5. Laabei M, Recker M, Rudkin JK, Aldeljawi M, Gulay Z, Sloan TJ, Williams P, Endres JL, Bayles KW, Fey PD, Yajjala VK, Widhelm T, Hawkins E, Lewis K, Parfett S, Scowen L, Peacock SJ, Holden M, Wilson D, Read TD, van den Elsen J, Priest NK, Feil EJ, Hurst LD, Josefsson E, Massey RC. 2014. Predicting the virulence of MRSA from its genome sequence. *Genome Res* 24:839-49.
6. Li M, Du X, Villaruz AE, Diep BA, Wang D, Song Y, Tian Y, Hu J, Yu F, Lu Y, Otto M. 2012. MRSA epidemic linked to a quickly spreading colonization and virulence determinant. *Nat Med* 18:816-9.
7. Humphrey W, Dalke A, Schulten K. 1996. VMD: visual molecular dynamics. *Journal of molecular graphics* 14:33-8, 27-8.
8. Grosdidier A, Zoete V, Michielin O. 2011. SwissDock, a protein-small molecule docking web service based on EADock DSS. *Nucleic acids research* 39:W270-7.
9. Trott O, Olson AJ. 2010. AutoDock Vina: improving the speed and accuracy of docking with a new scoring function, efficient optimization, and multithreading. *Journal of computational chemistry* 31:455-61.
10. Pettersen EF, Goddard TD, Huang CC, Couch GS, Greenblatt DM, Meng EC, Ferrin TE. 2004. UCSF Chimera--a visualization system for exploratory research and analysis. *Journal of computational chemistry* 25:1605-12.
